1

2

3 **Density-dependent selection in *Drosophila*: evolution of egg size and hatching time**

4

5

6 Srikant Venkitachalam, Srijan Das<sup>1</sup>, Auroni Deep<sup>2</sup> and Amitabh Joshi\*

7

8

9 *Evolutionary Biology Laboratory, Jawaharlal Nehru Centre for Advanced Scientific Research, Jakkur,*

10 *Bengaluru 560 064, India.*

11

12<sup>1</sup>*Present address: Molecular Genetics and Plant Biology Laboratory, Biology Division, Indian Institute of*

13*Science Education and Research Pune, Dr. Homi Bhabha Road, Pune 411 008, India.*

14

15<sup>2</sup>*Department of Zoology, University of Delhi, North Campus, Chhatra Marg, Faculty of Science, University*

16*Enclave, Delhi 110 007, India.*

17

18

19\*: **For correspondence**, Email: [ajoshi@jncasr.ac.in](mailto:ajoshi@jncasr.ac.in)

20**Email addresses of all authors:** [srikantv@jncasr.ac.in](mailto:srikantv@jncasr.ac.in), [srijan.das@students.iiserpune.ac.in](mailto:srijan.das@students.iiserpune.ac.in),

21[auronideep777@gmail.com](mailto:auronideep777@gmail.com)

22**Running title:** Larger egg size evolves in crowded *Drosophila* cultures

23**Keywords:** fruit-flies; egg hatchability; larval crowding; pre-adult competitive ability; head-starts in

24competition.

## 25 Abstract

26 Many different laboratory studies of adaptation to larval crowding in *Drosophila* spp. have all yielded the  
27 evolution of pre-adult competitive ability, even though the ecological context in which crowding was  
28 experienced varied across studies. However, the evolution of competitive ability was achieved through  
29 different suites of traits in studies wherein crowding was imposed in slightly different ways. Earlier studies  
30 showed the evolution of increased competitive ability via increased larval feeding rate and tolerance to  
31 nitrogenous waste, at the cost of food to biomass conversion efficiency. However, more recent studies, with  
32 crowding imposed at relatively low food levels, showed the evolution of competitive ability via decreased  
33 larval development time and body size, and an increase in the time efficiency of conversion of food to  
34 biomass, with no change in larval feeding rate or waste tolerance. Taken together, these studies have led to a  
35 more nuanced understanding of how the specific details of larval numbers, food amounts etc. can affect  
36 which traits evolve to confer increased competitive ability. Here, we report results from a study in which egg  
37 size and hatching time were assayed on three sets of populations adapted to larval crowding experienced in  
38 slightly different ways, as well as their low density ancestral control populations. Egg size and hatching time  
39 are traits that may provide larvae with initial advantages under crowding through increased starting larval  
40 size and a temporal head-start, respectively. In each set of populations adapted to some form of larval  
41 crowding, the evolution of longer and wider eggs was seen, compared to controls, thus making egg size the  
42 first consistent correlate of the evolution of increased larval competitive ability across *Drosophila*  
43 populations experiencing crowding in slightly different ways. Among the crowding-adapted populations,  
44 those crowded at the lowest overall eggs/food density, but the highest density of larvae in the feeding band,  
45 showed the largest eggs, on an average. All three sets of crowding-adapted populations showed shorter  
46 average egg hatching time than controls, but the difference was significant only in the case of populations  
47 experiencing the highest feeding band density. Our results underscore the importance of considering factors  
48 other than just eggs/food density when studying the evolution of competitive ability, as also the advantages  
49 of having multiple selection regimes within one experimental set up, allowing for a more nuanced  
50 understanding of the subtlety with which adaptive evolutionary trajectories can vary across even fairly  
51 similar selection regimes.

## 52Introduction

53Populations adapted to high density conditions are expected to evolve greater competitive ability, a  
54prediction highlighted by the theory of density-dependent selection, first formulated by MacArthur (1962)  
55and MacArthur and Wilson (1967) (see Mueller 1997, 2009 for reviews on subsequent developments in this  
56area). Several rigorous long-term selection experiments on populations of *Drosophila* reared under high  
57larval density conditions subsequently validated this prediction, showing the evolution of increased pre-adult  
58competitive ability in the crowding adapted populations when compared to their low density controls  
59(Mueller 1988; Nagarajan *et al.* 2016; Sarangi *et al.* 2016). However, the traits that evolved as correlates of  
60the increased pre-adult competitive ability differed widely across the studies (Nagarajan *et al.* 2016; Sarangi  
61*et al.* 2016; Sarangi 2018).

62

63The first of these experiments was done using two sets of replicate populations: the *K*-populations,  
64maintained at high population density (larval and adult) by serial transfer, and the *r*-populations, maintained  
65at low population density by culling (Mueller and Ayala 1981). Compared to the *r*-populations, the *K*-  
66populations evolved greater larval competitive ability (Mueller 1988), increased larval feeding rate (Joshi  
67and Mueller 1988), greater pupation height (Mueller and Sweet 1986; Joshi and Mueller 1993), greater  
68larval foraging path length (Sokolowski *et al.* 1997), increased adult dry weight and pre-adult viability at  
69high density (Bierbaum *et al.* 1989), and increased minimum larval food requirement for completion of  
70development (Mueller 1990).

71

72The next selection study sought to validate the results from the *r*- and *K*-populations, as the earlier selection  
73regime confounded the effects of larval and adult crowding. Moreover, the *r*-populations were maintained  
74on discrete generations, whereas the *K*-populations were maintained on overlapping generations (Mueller *et*  
75*al.* 1993). Consequently, populations of *D. melanogaster*, originally derived from a different geographical  
76region than the ancestors of the *r*- and *K*-populations, were used in a selection experiment that differentiated  
77the effects of larval and adult crowding, and in which all selected populations and controls were maintained  
78on a three-week discrete generation cycle (Mueller *et al.* 1993). The populations reared at high larval, but  
79not adult, density were called the CU (Crowded as larvae, Uncrowded as adults), and the low density

80controls were called UU (Uncrowded as larvae, Uncrowded as adults) (Mueller *et al.* 1993). Similar to what  
81was seen earlier in the *K*-populations, the CU populations evolved increased larval feeding rate and  
82minimum larval food requirement for completion of development (Joshi and Mueller 1996), and larval  
83foraging path length (Sokolowski *et al.* 1997). Moreover, the CU populations evolved increased pre-adult  
84urea tolerance (Shiotsugu *et al.* 1997; Borash *et al.* 1998) and ammonia tolerance (Borash *et al.* 1998). The  
85CU populations, however, did not evolve increased pupation height than controls (Joshi and Mueller 1996),  
86unlike the *K*-populations; possible explanations are discussed by Joshi *et al.* (2003).

87

88The broadly consistent results from the *r*- and *K*-populations and the CU and UU populations, together with  
89similar results from the *rK* and *r×rK* populations (Guo *et al.* 1991), resulted in the canonical model for  
90adaptation to larval crowding in *D. melanogaster* populations: these populations would exhibit increased  
91pre-adult competitive ability and larval feeding rate, foraging path length, and tolerance to ammonia and  
92urea, but would show reduced food to biomass conversion efficiency as a trade-off (Mueller 1997; Joshi *et*  
93*al.* 2001; Prasad and Joshi 2003; Mueller *et al.* 2005; Mueller 2009; Mueller and Cabral 2012; Mueller and  
94Barter 2015; Bitner *et al.* 2021). The canonical model was further strengthened by observations in *D.*  
95*melanogaster* of greater pre-adult competitive ability in populations selected for increased larval feeding rate  
96(Burnet *et al.* 1977), and the evolution of reduced pre-adult competitive ability in populations that evolved  
97reduced larval feeding rate due to selection for either rapid pre-adult development (Prasad *et al.* 2001;  
98Shakarad *et al.* 2005; Rajamani *et al.* 2006) or for increased parasitoid resistance (Fellowes *et al.* 1998,  
991999).

100

101The canonical model was, nevertheless, challenged later by three selection studies involving adaptation to  
102larval crowding, in *D. ananassae*, *D. nasuta nasuta* and *D. melanogaster*, respectively (Nagarajan *et al.*  
1032016; Sarangi *et al.* 2016). In all three studies, crowding adapted populations did evolve greater larval  
104competitive ability compared to their respective low density controls, but did so through a suite of traits  
105different from the canonical model. No evolution of increased feeding rate was seen, nor were there any  
106changes in urea tolerance, compared to controls. Instead, the crowding-adapted populations seemed to  
107evolve greater larval competitive ability primarily through a decrease in pre-adult development time,

108expressed even when assayed at low density, and an increase in the time efficiency of food to biomass  
109conversion, relative to controls (Nagarajan *et al.* 2016; Sarangi *et al.* 2016). It then became apparent that the  
110major difference between these studies and the earlier work that had given rise to the canonical model was in  
111the ecological details of the context in which larvae in selected populations experienced crowding (Sarangi  
1122018). Specifically, the populations used by Nagarajan *et al.* (2016) and Sarangi *et al.* (2016) had very low  
113amounts of food per vial, whereas the earlier studies had used larger amounts of food and a greater number  
114of eggs. For example, the MCU populations of Sarangi *et al.* (2016) were maintained at a density of about  
115600 eggs per vial containing 1.5 mL food whereas the CU populations (Mueller *et al.* 1993) were reared in  
116vials containing about 1500 eggs in 6-7 mL of food. Subsequently, altering the amount of food and number  
117of eggs while keeping overall eggs per unit food density the same was shown to affect pre-adult survivorship  
118and development time, as well as the weight distribution of eclosing flies (Sarangi 2018). Therefore, in order  
119to examine this phenomenon further, two new sets of *D. melanogaster* populations were subjected to  
120selection for adaptation to larval crowding. One set of four populations, called LCU, was maintained at  
121around 1200 eggs in 6 mL food, and this regime was meant to approximate the CU populations of Mueller  
122*et al.* (1993). The other set of four populations was called the CCU, and was maintained at twice the number  
123of eggs and twice the volume of food, and thus an identical overall density, as the MCU populations  
124(Sarangi 2018). Thus, a system of 16 populations was created: ancestral controls (MB), MCU, CCU and  
125LCU, with four replicate populations in each regime (Sarangi 2018).

126

127Interestingly, although the LCU and CCU populations did evolve greater pre-adult competitive ability  
128compared to the MB controls (Sarangi 2018; S. Venkitachalam and A. Joshi, *unpubl. data*), they did so via  
129an increased larval feeding rate, unlike the MCU populations (Sarangi 2018). However, as in the MCU  
130populations, no evolution of pre-adult urea or ammonia tolerance was seen in the CCU and LCU populations  
131(Sarangi 2018). The overall picture that emerges is, thus, one of ‘unity in ends, diversity in means’, with  
132even populations experiencing identical larval density in slightly different ecological contexts exhibiting the  
133evolution of increased pre-adult competitive ability with or without a concomitant increase in larval feeding  
134rate (Sarangi 2018). Here, we show that there is nevertheless a commonality in evolutionary trajectories  
135across the MCU, CCU and LCU populations in that they all seem to have evolved a shorter egg hatching

136time and a greater egg size than the MB controls. These traits may be important for larval competitive  
137ability, as together they can effectively provide a temporal head-start and initial size advantage in  
138competition (Sokolowski *et al.* 1997; Bakker 1961, 1969).

139

140

## Materials and methods

### 141 *Experimental populations*

142 We used four sets of long-term laboratory populations of *D. melanogaster*, with each set consisting of four  
143 replicate populations, as briefly described below. The derivation and maintenance of all these populations  
144 have been discussed in detail by Sarangi (2018).

145 **MB 1-4:** These are four low density reared populations that serve as ancestral controls to the three sets of  
146 crowding-adapted populations. They are maintained at a relatively low density of approx. 70 eggs in 6 mL  
147 of cornmeal-sugar-yeast medium, in cylindrical Borosilicate glass vials of 2.2-2.4 cm inner diameter and 9.5  
148 cm height.

149 **MCU 1-4:** These populations experience larval crowding at ~600 eggs in ~1.5 mL of cornmeal medium, in  
150 the same type of vials as MBs. At the time of assaying, the MCUs had undergone at least 218 generations of  
151 selection (blocks (i.e. replicate populations) 1, 2 assayed at gen. 218; blocks 3, 4 assayed at gen. 219).

152 **CCU 1-4:** These populations experience larval crowding at ~1200 eggs in ~3 mL of cornmeal medium, in  
153 the same type of vials as MBs. It should be noted that MCU and CCU have the exact same overall eggs/food  
154 density. At the time of assaying, the CCUs had undergone at least 97 generations of selection (blocks 1, 2  
155 assayed at gen. 97; blocks 3, 4 assayed at gen. 98).

156 **LCU 1-4:** These populations experience larval crowding at ~1200 eggs in ~6 mL of cornmeal medium, in  
157 Borosilicate glass vials of ~2 cm inner diameter and ~9 cm height (approx. 6-dram volume, to mimic the CU  
158 populations of Mueller *et al.* (1993)). At the time of assaying, the LCUs had undergone at least 96  
159 generations of selection (blocks 1, 2 assayed at gen. 96; blocks 3, 4 assayed at gen. 97).

160

161 While the pre-adult stages of each population are maintained in vials, the adults are transferred to Plexiglas  
162 cages ( $25 \times 20 \times 15 \text{ cm}^3$ ) on the day of eclosion. Given the low larval density of MB populations, they are  
163 transferred to cages on the 11<sup>th</sup> day from egg collection. In the crowding-adapted populations, there is a large

164 amount of variation in eclosion time and thus, transfer of eclosing adults to cages is done daily from day 8 to  
165 day 21 from egg collection. Fresh cornmeal food plates are given (following a fresh plate given on initiation  
166 of transfers) on day 10, 12, 14 and 17 from egg collection. On day 18 from egg collection, the flies in the  
167 cages are provided a food plate with a generous smear of a paste of live yeast mixed with water and a few  
168 drops of glacial acetic acid. On day 20 from egg collection, the flies are provided cornmeal food plates with  
169 vertical edges present for egg laying, for 18 hours. Finally, eggs laid by the flies on these plates are used to  
170 initiate the next generation, with eggs being transferred to fresh vials containing the respective food volume  
171 assigned to each population. All populations are maintained under constant light, at  $25 \pm 1^\circ\text{C}$  and 70-90%  
172 relative humidity.

173

#### 174 ***Standardisation of populations***

175 Prior to assays, all populations were subjected to one generation of standardisation (rearing in a common  
176 low larval density environment), to eliminate any non-genetic parental effects. Eggs from each population  
177 were collected at approx. 70 eggs in 6 mL of food per vial, for a total of 40 vials per population. The flies  
178 eclosing in these vials were transferred to cages on day 11 from egg collection, following which they were  
179 provided a food plate, with a generous smear of the live yeast-water-acetic acid paste, for approx. 48 hours.  
180 On day 13 from egg collection, the flies were provided a food plate for egg collection for around 18 hours,  
181 and two rearing environments for the assay were set up on day 14 from egg collection. All assays were  
182 conducted in constant light, at  $25 \pm 1^\circ\text{C}$  and 70-90% relative humidity.

183

#### 184 ***Rearing environments***

185 For each population, the eggs collected from the previous standardised generation were used to form two  
186 sets of assay populations, reared at two larval densities.

187 ***Low density rearing:*** The first set was kept at a relatively low eggs/food density of ~70 eggs in 6 mL  
188 cornmeal medium per vial, with a total of 40 vials per replicate population. As in the standardisation, the  
189 adults eclosing in the vials were transferred to a cage on day 11 from egg collection. On day 17 from egg  
190 collection, the flies were provided a food plate with a generous smear of live yeast paste for ~48 hours.  
191 Following this, a “dummy” egg collection cornmeal plate was provided for an hour, which was for the



192 laying of any eggs previously incubating inside the females. Relatively synchronized eggs for the hatching  
193 time and egg size assays were then obtained by providing a harder plate with double the usual agar and  
194 different composition (only yeast, sugar added), for 45 minutes. This composition ensured easier egg  
195 removal for counting.

196 **High-density rearing:** Eggs for the second set were collected into vials at a relatively high eggs/food density  
197 – approx. 300 eggs in 2 mL cornmeal medium per vial, with a total of 12 vials per population. This simple  
198 density change was done as a first pass to obtain reduced adult size without impacting survivorship greatly.  
199 Unlike in the low density rearing conditions, adults emerging from the vials were transferred to cages daily  
200 from the day of the start until the end of eclosion, usually day 15-16. The protocols from day 17 onwards  
201 were the same as in the low density reared populations.

202

### 203 **Egg hatching time**

204 The assay was carried out in plastic Petri plates (90 mm diameter × 14 mm height), in which a thin layer of  
205 12 g/L agar solution (containing 2.4 g/L methyl 4-hydroxybenzoate, as preservative) was spread. A 6 × 6  
206 square grid (36 square cells, each having 3 mm sides) was pasted on the bottom of each Petri plate, which  
207 was visible through the transparent layer of agar. A total of 5 Petri plates were used per selection × rearing  
208 density × block combination, with 36 eggs per Petri plate – one egg per cell of the grid (Figure 1). Checks  
209 for egg hatching were done at 13, 15, 17, 18, 19, 20, 21, 22, 24, 26, 28 and 30 hours from egg laying,  
210 respectively. At each check, eggs which hatched in the time interval between the current and previous check  
211 were noted.

212

### 213 **Egg hatchability**

214 From the hatching time assay, we also recorded how many eggs hatched within 48 hours from egg laying  
215 were noted. The egg hatchability was calculated as the number of eggs hatched divided by the total number  
216 of eggs. Earlier hatchability experiments on populations with relatively close ancestry to our MB  
217 populations did not use clear eggs due to their infertility (Chippindale *et al.* 1997). However, we have found  
218 that some clear eggs in our populations can lead to viable adults (S. Venkitachalam, *pers. obs.*), and thus we  
219 used all but the visibly damaged eggs for our experiments.



220

### 221 *Egg length and width*

222 For size measurements, a total of 30 eggs (obtained as 10 eggs each in 3 replicates) were measured per  
223 selection × rearing density × block combination. The eggs were placed on a Neubauer haemocytometer and  
224 photographed under a stereo-microscope. The parallel lines on the haemocytometer, which were a known  
225 distance apart (200 µm or 250 µm, depending on the set of lines used; see Figure 2) provided a scale with  
226 which to measure the eggs. Egg length (estimate of polar axis) and egg width (estimate of minor axis) were  
227 measured from the photographs (Figure 2) using ImageJ (Rasband 1997-2018).

228

### 229 *Statistical analyses*

230 Every replicate larval crowding adapted population shares ancestry with an MB population with the same  
231 replicate subscript i.e. replicate population  $i$  in the MCU, CCU and LCU regimes is derived from replicate  $i$   
232 of MB ( $i = 1..4$ ). This permits the use of a completely randomized block design in our statistical analysis,  
233 with replicate populations bearing the same subscript treated as blocks. Assays were conducted concurrently  
234 on all populations of a block. The data were subjected to a mixed model ANOVA (type III) in a fully  
235 factorial design, with the block (4 levels) treated as a random factor. Selection (4 levels) and rearing density  
236 (2 levels) were treated as fixed factors. For hatchability, the analysis was repeated after performing an  
237 arcsine square root transformation on the data, to check for differences in the statistical significance of the  
238 fixed factors. All ANOVAs were done using STATISTICA™ Windows release 5.0 (Statsoft 1995). Tukey's  
239 HSD was used for post-hoc pairwise comparisons at  $\alpha = 0.05$ . The image measurements for egg size were  
240 done using ImageJ (Rasband 1997-2018). Pearson's product-moment correlation coefficients were  
241 calculated pairwise for population means of egg hatching time, egg length and egg width.

242

243

## 243 **Results**

244

### 245 *Egg hatching time*

246 Mean egg hatching time across all four types of selected and control populations was close to 20 hours, and  
247 the range of variation among means was only about 30 min (Figure 3). However, all three sets of selected

248populations had shorter mean hatching times than the MB controls, the shortest being in the LCU  
249populations, followed by CCU, and then by MCU (Figure 3). The ANOVA revealed a significant main  
250effect of selection ( $F_{3,9} = 4.142, P = 0.042$ ) on egg hatching time, but post-hoc pairwise comparisons showed  
251a significant difference only between LCU and MB (Figure 3). There neither a significant main effect of  
252rearing density ( $F_{1,3} = 0.631, P = 0.485$ ), nor a significant selection  $\times$  rearing density interaction ( $F_{3,9} =$   
2531.871,  $P = 0.205$ ).

254

### 255Egg hatchability

256Mean egg hatchability ranged from about 75-90% across selection  $\times$  rearing density combinations, with flies  
257reared as larvae at high density (300 eggs in 2 mL food) tending to lay more viable eggs than those reared at  
258low density (70 eggs in 6 mL food), most markedly so in the MCU populations (Figure 4). The ANOVA  
259revealed no significant main effect of selection ( $F_{3,9} = 1.067, P = 0.410$ ). There was, however, a significant  
260main effect of rearing density ( $F_{1,3} = 12.484, P = 0.039$ ), as well as a significant selection  $\times$  rearing density  
261interaction ( $F_{3,9} = 4.236, P = 0.040$ ). Post-hoc comparisons revealed that only MCU showed significantly  
262higher hatchability when flies were reared as larvae at high versus low density. Similar but non-significant  
263differences were also seen in the MB and LCU, whereas mean hatchability of CCU reared at low versus  
264high larval density was very similar (Figure 4). The pattern of significant ANOVA effects was unaffected by  
265whether untransformed or arcsine transformed data were used.

266

### 267Egg length ( $\mu\text{m}$ )

268Mean egg length in MB populations was significantly less than any of the sets of populations selected for  
269larval crowding (Figure 5), driving a significant ANOVA main effect of selection ( $F_{3,9} = 22.104, P < 0.001$ ).  
270Egg length, on an average, did not differ significantly between rearing densities (main effect of rearing  
271density:  $F_{1,3} = 8.109, P = 0.065$ ; Figure 5). LCU eggs were longer than those of MCU across both rearing  
272densities, but longer than CCU eggs only at high rearing density. On the other hand, MCU eggs were shorter  
273than CCU eggs at low density, but of similar length at high density (Figure 5), and these rearing density-  
274specific differences among various crowding adapted sets of populations drove a significant ANOVA  
275selection  $\times$  rearing density interaction ( $F_{3,9} = 4.830, P = 0.029$ ). This pattern of differences between CCU

276and the other crowding adapted populations was likely due to an average of 9  $\mu\text{m}$  longer eggs laid by CCU  
277females when reared at low as compared to high density, although this difference itself was not statistically  
278significant (Figure 5).

279

### 280Egg width ( $\mu\text{m}$ )

281Overall, the egg width data were fairly similar to those for egg length (Figures 5,6), with egg width being  
282considerably lower in MB populations compared to all crowding adapted populations (ANOVA main effect  
283of selection:  $F_{3,9} = 5.496$ ,  $P = 0.020$ ), and not differing, on an average, between rearing densities (main  
284effect of rearing density:  $F_{1,3} = 0.584$ ,  $P = 0.500$ ) (Figure 6). Eggs laid by MCU, CCU and LCU flies reared  
285at low density did not differ much in mean width, whereas at high rearing density LCU females laid the  
286widest eggs, and the MCU and CCU did not significantly differ in egg width (selection  $\times$  rearing density  
287interaction:  $F_{3,9} = 7.971$ ,  $P = 0.007$ ; Figure 6).

288

### 289Trait correlations

290There was a strong, positive correlation across population means between egg length and width ( $r = +0.771$ ,  
291 $P < 0.001$ ; Figure 7), indicating that populations with longer eggs also tended to have wider eggs, and vice  
292versa. The correlations for mean hatching time and mean egg length ( $r = -0.395$ ,  $P = 0.025$ ), and for mean  
293hatching time and mean egg width ( $r = -0.548$ ,  $P = 0.001$ ) were both negative, although the strength of the  
294correlation was moderate in both cases, being stronger for hatching time with egg width (Figure 7). There  
295were no discernible patterns for within population correlations between egg length and egg width, with the  
296mean correlation coefficient being around 0.11, and no selection  $\times$  rearing density combination exceeding a  
297correlation coefficient of 0.3 (data not shown).

298

299

## Discussion

300Despite the variation in which traits underlie the evolution of greater pre-adult competitive ability in  
301*Drosophila* populations that experience larval crowding under slightly varying conditions (reviewed in  
302Sarangi 2018), our results suggest one common adaptation across at least three such selection regimes  
303covering a range of egg number and food amount combinations that more or less mimics the range of

304previous studies. Adults from the MCU, CCU and LCU populations laid eggs with greater length and width  
305compared to the MB populations, when assayed at low (70 eggs in 6 mL food) or relatively high (300 eggs  
306in 2 mL) density rearing conditions (Figures 5 and 6). Along with the strong positive correlation seen  
307between the mean egg length and mean egg width across populations (Figure 7), these results indicate an  
308increase in overall egg size of all these three sets of crowding adapted populations compared to the ancestral  
309controls. Our results are also in agreement with earlier study from a different laboratory, which  
310demonstrated an increase in egg size, relative to controls, in crowding adapted populations derived from our  
311MCU populations and maintained on a similar regime (Kumar 2014).

312

313The eggs laid by LCU females were larger than those laid by MCU at both low and high density rearing  
314conditions, with CCU eggs being intermediate in size (Figures 5 and 6). The differences among the MCU,  
315CCU and LCU populations themselves are perhaps just as important as the consistent difference between the  
316egg size of the crowding-adapted and MB populations. While previous comparisons of results from selection  
317studies in differently crowded cultures have focused on the repeatability of qualitative differences found  
318between a single set of crowding adapted populations against its controls (Joshi and Mueller 1996;  
319Nagarajan *et al.* 2016; Sarangi *et al.* 2016), our study system permits more nuanced, quantitative  
320comparisons between multiple types of high-density selection regimes.

321

322The importance of plasticity in egg size has been studied extensively from the perspective of non-genetic  
323maternal effects, in the contexts of both competition and malnutrition (Kawecki 1995; Azevedo *et al.* 1997;  
324Prasad *et al.* 2003; Vijendravarma *et al.* 2010; Yanagi *et al.* 2013). In our study, egg size did not show any  
325statistically significant difference between parents reared at low or high larval density (Figures 5,6).  
326However, the CCU populations did show a consistent trend for smaller eggs when crowded at the given  
327density. It may be possible that either the relative scaling of egg size with female body size, or the sensitivity  
328of female size to larval crowding, might be different across the MCU, CCU and LCU populations. This  
329might be worth exploring in the future.

330

331 Moreover, since it is also known that crowding more severe than what we used can further decrease body  
332size (Sang 1949; Bakker 1961; S. Venkitachalam and A. Joshi *unpubl. data*), observed effects of rearing  
333density on egg traits in these populations may change under more extreme crowding, where size at eclosion  
334and pre-adult survivorship are more severely impacted than they were in this study.

335

336If we compare our egg size results with those obtained in a comparison of populations selected for rapid pre-  
337adult development (FEJ) relative to their controls (JB), which are similar to the MB populations (first  
338described in Prasad *et al.* 2000), there are some interesting similarities and differences. Although the MCU,  
339CCU and LCU populations all have reduced pre-adult development time compared to MB controls (Sarangi  
3402018), the FEJ populations had undergone a far greater reduction in pre-adult development time, relative to  
341their controls, as that was the primary trait under selection (Prasad *et al.* 2000; Prasad and Joshi 2003). On  
342an average, eggs laid by FEJ females, after rearing at low density as larvae, were 3.8% longer, 7% wider,  
343and 11% heavier than those of their controls (B.M. Prakash and A. Joshi, *unpubl. data*). The MCU, CCU  
344and LCU populations in this study exhibited length increases of 6.5%, 8.2% and 9.5%, respectively,  
345compared to the MB controls, and the corresponding width increases were 3.9%, 3.6% and 5.1%. From this  
346comparison, we might conclude that MCU, CCU and LCU eggs are likely to be about 10-15% heavier than  
347MB eggs. Interestingly, in the FEJ populations, the increase in width was greater than in length; it is just the  
348opposite in the MCU, CCU and LCU populations. At this point, we cannot say why this may be so,  
349although, given the very different selection pressures (rapid development vs. larval crowding), the  
350mechanisms underlying the response could differ. The difference is unlikely to be explained by female size  
351differences, since flies of FEJ, as well as MCU, CCU and LCU populations tend to be quite small relative to  
352controls.

353

354Although eggs from all crowding-adapted populations hatched faster than those of the controls, only the  
355difference between mean egg hatching time between the LCU and MB populations was statistically  
356significant (Figure 3). Moreover, the difference between LCU and MB mean egg hatching time was only  
357~30 minutes. However, given the egg size results (Figures 5,6), the pattern of MB > MCU > CCU > LCU  
358for egg hatching time (Figure 3), and the negative correlation between mean egg length and mean hatching

359time, as well as between mean egg width and mean hatching time, we might expect crowding adapted  
360populations that evolve increased egg size and decreased hatching time to benefit from a potent head-start in  
361conditions of high pre-adult competition. Thus, we might expect LCU larvae to have a greater head-start in  
362terms of pre-adult competition, compared to MCU larvae, and much greater still compared to MB larvae.  
363This does not, however, necessarily imply that LCU larvae will have greater pre-adult competitive ability  
364than MCU larvae, as differences in growth rates, efficiency and waste tolerance may also play a major role  
365in determining pre-adult competitive ability (Bakker 1961; Joshi and Mueller 1996; Santos *et al.* 1997;  
366Borash *et al.* 1998; Nagarajan *et al.* 2016; Sarangi *et al.* 2016). The evolution of a greater potential head-  
367start in the LCU populations could be driven by the fact that, compared to the MCU and CCU populations,  
368the LCU larvae experience the highest density within the feeding band (the few mm deep zone below the  
369food surface within which larvae feed), even though their overall eggs/food density is lower than that in the  
370other two selection regimes.

371

372Overall hatchability was lower in our study than usually observed in related populations (e.g. over 90% in  
373Chippindale *et al.* (1994)). This might be attributed to reduced humidity due to the very thin layer of agar  
374used by us – future experiments using a thicker agar layer or regular cornmeal food might alleviate the  
375survivorship, if this explanation is correct. We also observed reduced hatchability of eggs laid by MCU flies  
376reared under low density conditions (Figure 4). It is not clear if this is due to an increase in infertile or  
377unviable eggs (Chippindale *et al.* 1994, 1997), and whether it is driven by some correlated response(s) to  
378evolution under larval crowding for over 200 generations of selection in the MCU populations, much longer  
379than their CCU and LCU counterparts.

380

381In conclusion, our results highlight increased egg size as being a consistent evolutionary correlate of greater  
382pre-adult competitive ability across three differently crowded selection regimes that otherwise differ in the  
383traits they have evolved in response to chronic larval crowding. Moreover, adults from populations crowded  
384with the lowest eggs/food density, but the highest feeding band density, laid the largest eggs with the fastest  
385hatching times, thus potentially allowing for a substantial head-start in the context of pre-adult competition.  
386The study system we describe allows the comparison of adaptations to different crowding scenarios,

387highlighting quantitative differences that may otherwise not be possible to see when comparing qualitative  
388results between different long-term selection experiments.

389

390

## Acknowledgments

391We thank Sajith V. S., Ramesh Kokile, Avani Mital, Medha Rao, Bhavya Pratap Singh, Rajanna N. and  
392Muniraju P. for help with the experiments. S. Venkitachalam was supported by a doctoral fellowship from  
393the Jawaharlal Nehru Centre for Advanced Scientific Research. S. Das and A. Deep had their stay supported  
394by the Jawaharlal Nehru Centre for Advanced Scientific Research's Project Oriented Biological Education  
395and Summer Research Fellowship Programme, respectively. This work was supported by a J. C. Bose  
396National Fellowship from the Science and Engineering Research Board, Government of India, to A. Joshi  
397and in part by A. Joshi's personal funds.



## 398References

- 399Azevedo R.B., Partridge L. and French V. 1997 Life-history consequences of egg size in *Drosophila*  
400*melanogaster*. *Am. Nat.* **150**, 250–282.
- 401Bakker K. 1961 An analysis of factors which determine success in competition for food among larvae of  
402*Drosophila melanogaster*. *Arch. Neerl. Zool.* **14**, 200–281.
- 403Bakker K. 1969 Selection for rate of growth and its influence on competitive ability of larvae of *Drosophila*  
404*melanogaster*. *Neth. J. Zool.* **19**, 541–595.
- 405Bierbaum T.J., Mueller L.D. and Ayala F.J. 1989 Density-dependent evolution of life-history traits in  
406*Drosophila melanogaster*. *Evolution* **43**, 382–392.
- 407Bitner K., Rutledge G.A., Kezos J.N. and Mueller L.D. 2021 The effects of adaptation to urea on feeding  
408rates and growth in *Drosophila* larvae. *Ecol. Evol.* **11**, 9516–9529.
- 409Borash D.J., Gibbs A.G., Joshi A. and Mueller L.D. 1998 A genetic polymorphism maintained by natural  
410selection in a temporally varying environment. *Am. Nat.* **151**, 148–156.
- 411Burnet B., Sewell D. and Bos M. 1977 Genetic analysis of larval feeding behaviour in *Drosophila*  
412*melanogaster*. II. Growth relations and competition between selected lines. *Genet. Res.* **30**, 149–161.
- 413Chippindale A.K., Hoang D., Service P. and Rose M.R. 1994 The evolution of development in *Drosophila*  
414selected for postponed senescence. *Evolution* **48**, 1880–1899.
- 415Chippindale A.K., Alipaz J.A., Chen H.-W. and Rose M.R. 1997 Experimental evolution of accelerated  
416development in *Drosophila*. 1. Developmental speed and larval survival. *Evolution* **51**, 1536–1551.
- 417Fellowes M.D.E., Kraaijeveld A.R. and Godfray H.C.J. 1998 Trade-off associated with selection for  
418increased ability to resist parasitoid attack in *Drosophila melanogaster*. *Proc. R. Soc. Lond. B* **265**, 1553–  
4191558.
- 420Fellowes M.D.E., Kraaijeveld A.R. and Godfray H.C.J. 1999 Association between feeding rate and  
421parasitoid resistance in *Drosophila melanogaster*. *Evolution* **53**, 1302–1305.
- 422Guo, P.Z., Mueller L.D. and Ayala F.J. 1991 Evolution of behavior by density-dependent natural selection.  
423*Proc. Natl. Acad. Sci. USA* **88**, 10905–10906.
- 424Joshi A. and Mueller L.D. 1988 Evolution of higher feeding rate in *Drosophila* due to density-dependent  
425natural selection. *Evolution* **42**, 1090–1092.

- 426Joshi A. and Mueller L.D. 1993 Directional and stabilizing density-dependent natural selection for pupation  
427height in *Drosophila melanogaster*. *Evolution* **47**, 176–184.
- 428Joshi A. and Mueller L.D. 1996 Density-dependent natural selection in *Drosophila*: trade-offs between  
429larval food acquisition and utilization. *Evol. Ecol.* **10**, 463–474.
- 430Joshi A., Prasad N.G. and Shakarad M. 2001 *K*-selection,  $\alpha$ -selection, effectiveness, and tolerance in  
431competition: density-dependent selection revisited. *J. Genet.* **80**, 63–75.
- 432Joshi A., Castillo R.H. and Mueller L.D. 2003. The contribution of ancestry, chance, and past and ongoing  
433selection to adaptive evolution. *J. Genet.* **82**, 147–162.
- 434Kawecki T.J. 1995 Adaptive plasticity of egg size in response to competition in the cowpea weevil,  
435*Callosobruchus maculatus* (Coleoptera: Bruchidae). *Oecologia* **102**, 81–85.
- 436Kumar L. 2014 *A study of female reproductive investment in populations of Drosophila melanogaster*  
437*adapted to larval crowding*. M.S. Thesis, Indian Institute of Science Education and Research, Mohali, India.
- 438MacArthur R.H. 1962 Some generalized theorems of natural selection. *Proc. Natl. Acad. Sci. USA* **48**, 1893–  
4391897.
- 440MacArthur R.H. and Wilson E.O. 1967 *The theory of island biogeography*. Princeton University Press,  
441Princeton, NJ, USA.
- 442Mueller L.D. 1988 Evolution of competitive ability in *Drosophila* by density-dependent natural selection.  
443*Proc. Natl. Acad. Sci. USA* **85**, 4383–4386.
- 444Mueller L.D. 1990 Density-dependent natural selection does not increase efficiency. *Evol. Ecol.* **4**, 290–297.
- 445Mueller L.D. 1997 Theoretical and empirical examination of density-dependent selection. *Annu. Rev. Ecol.*  
446*Syst.* **28**, 269–288.
- 447Mueller L.D. 2009 Fitness, demography, and population dynamics in laboratory experiments. In:  
448*Experimental evolution: concepts, methods and applications of selection experiments* (Eds. T. Garland Jr.  
449and M.R. Rose) pp. 197–216. University of California Press, Berkeley, CA, USA.
- 450Mueller L.D. and Ayala F.J. 1981 Trade-off between *r*-selection and *K*-selection in *Drosophila* populations.  
451*Proc. Natl. Acad. Sci. USA* **78**, 1303–1305.
- 452Mueller L.D. and Sweet V.F. 1986 Density-dependent natural selection in *Drosophila*: evolution of pupation  
453height. *Evolution* **40**, 1354–1356.

- 454Mueller, L.D. and Cabral L.G. 2012 Does phenotypic plasticity for adult size versus food level in  
455*Drosophila melanogaster* evolve in response to adaptation to different rearing densities? *Evolution* **66**, 263–  
456271.
- 457Mueller L.D. and Barter T.T. 2015 A model of the evolution of larval feeding rate in *Drosophila* driven by  
458conflicting energy demands. *Genetica* **143**, 93–100.
- 459Mueller L.D., Graves J. and Rose M.R. 1993 Interactions between density-dependent and age-specific  
460selection in *Drosophila melanogaster*. *Func. Ecol.* **7**, 469–479.
- 461Mueller L.D., Rauser C.L. and Rose M.R. 2005 Population dynamics, life history, and demography: lessons  
462from *Drosophila*. *Adv. Ecol. Res.* **37**, 77–99.
- 463Nagarajan A., Natarajan S.B., Jayaram M., Thammanna A., Chari S., Bose J., Jois S.V. and Joshi A. 2016  
464Adaptation to larval crowding in *Drosophila ananassae* and *Drosophila nasuta nasuta*: increased larval  
465competitive ability without increased larval feeding rate. *J. Genet.* **95**, 411–425.
- 466Prasad N.G. and Joshi A. 2003 What have two decades of laboratory life-history evolution studies on  
467*Drosophila melanogaster* taught us? *J. Genet.* **82**, 45–76.
- 468Prasad N.G., Shakarad M., Rajamani M. and Joshi A. 2003 Interaction between the effects of maternal and  
469larval levels of nutrition on pre-adult survival in *Drosophila melanogaster*. *Evol. Ecol. Res.* **5**, 903–911.
- 470Prasad N.G., Shakarad M., Anitha D., Rajamani M. and Joshi A. 2001 Correlated responses to selection for  
471faster development and early reproduction in *Drosophila*: the evolution of larval traits. *Evolution* **55**, 1363–  
4721372.
- 473Prasad N.G., Shakarad M., Gohil V.M., Sheeba V., Rajamani M. and Joshi A. 2000 Evolution of reduced  
474pre-adult viability and larval growth rate in laboratory populations of *Drosophila melanogaster* selected for  
475shorter development time. *Genet. Res.* **76**, 249–259.
- 476Rajamani M., Raghavendra N., Prasad N.G., Archana N., Joshi A. and Shakarad M. 2006 Reduced larval  
477feeding rate is a strong evolutionary correlate of rapid development in *Drosophila melanogaster*. *J. Genet.*  
478**85**, 209–212.
- 479Rasband W.S. 1997-2018 ImageJ. U.S. National Institutes of Health, Bethesda, MD, USA  
480(<https://imagej.nih.gov/ij/>).

- 481Sang J.H. 1949 The ecological determinants of population growth in a *Drosophila* culture. III. Larval and  
482pupal survival. *Physiol. Zool.* **22**, 183–202.
- 483Santos M., Borash D.J., Joshi A., Bounlutay N. and Mueller L.D. 1997 Density-dependent natural selection  
484in *Drosophila*: evolution of growth rate and body size. *Evolution* **51**, 420–432.
- 485Sarangi M. 2018 *Ecological details mediate different paths to the evolution of larval competitive ability in*  
486*Drosophila*. Ph.D. Thesis, Jawaharlal Nehru Centre for Advanced Scientific Research, Bengaluru, India.
- 487Sarangi M., Nagarajan A., Dey S., Bose J. and Joshi A. 2016 Evolution of increased larval competitive  
488ability in *Drosophila melanogaster* without increased larval feeding rate. *J. Genet.* **95**, 491–503.
- 489Shakarad M., Prasad N.G., Gokhale K., Gadagkar V., Rajamani M. and Joshi A. 2005 Faster development  
490does not lead to correlated evolution of greater competitive ability in *Drosophila melanogaster*. *Biol. Lett.* **1**,  
49191–94.
- 492Shiotsugu J., Leroi A.M., Yashiro H., Rose M.R. and Mueller L.D. 1997 The symmetry of correlated  
493selection responses in adaptive evolution: an experimental study using *Drosophila*. *Evolution* **51**, 163–172.
- 494Sokolowski M.B., Pereira H.S. and Hughes K. 1997 Evolution of foraging behavior in *Drosophila* by  
495density-dependent selection. *Proc. Natl. Acad. Sci. USA* **94**, 7373–7377.
- 496StatSoft 1995 Statistica Vol. I: general conventions and statistics 1. StatSoft Inc., Tulsa, OK, USA.
- 497Vijendravarma R.K., Narasimha S. and Kawecki T.J. 2010 Effects of parental larval diet on egg size and  
498offspring traits in *Drosophila*. *Biol. Lett.* **6**, 238–241.
- 499Yanagi S., Saeki Y. and Tuda M. 2013 Adaptive egg size plasticity for larval competition and its limits in  
500the seed beetle *Callosobruchus chinensis*. *Entomol. Exp. Appl.* **148**, 182–187.

## 501 **Figure legends**

502 Figure 1: Apparatus for egg hatching time and hatchability measurements. The  $6 \times 6$  grid is pasted on the  
503 bottom of a Petri plate containing a thin layer of agar solution. Each cell of the grid contains an egg, as can  
504 be seen in the image. The label denotes the selection  $\times$  rearing density  $\times$  block combination used, along with  
505 the replicate plate number ('1' in this case).

506 Figure 2: Egg size measurement setup for a replicate containing 10 eggs. There were three such replicates  
507 for each selection  $\times$  rearing density  $\times$  block combination. Eggs were numbered from 1 through 10. The egg  
508 labelled '9' has two lines of measurement drawn for demonstration: the yellow line denotes egg length and  
509 the red line, egg width. The background is that of a Neubauer haemocytometer, which contains parallel lines  
510 set a known distance apart, and can thus be used to determine the scale in the image (parallel lines set either  
511  $250 \mu\text{m}$  or  $200 \mu\text{m}$  apart could be used, as marked in the figure).

512 Figure 3: Mean egg hatching time in hours for the four levels of selection, averaged over all levels of rearing  
513 density and block. The error bars show 95% confidence intervals, calculated from post-hoc Tukey's HSD,  
514 and allow for visual hypothesis testing – identical superscript letters denote means that did not differ  
515 significantly, whereas different letters denote means that differed significantly.

516 Figure 4: Mean hatchability (%), for all combinations of four levels of selection and two levels of rearing  
517 density, averaged across all blocks. The error bars show 95% confidence intervals, calculated from post-hoc  
518 Tukey's HSD, and allow for visual hypothesis testing – identical superscript letters denote means that did  
519 not differ significantly, whereas different letters denote means that differed significantly.

520 Figure 5: Mean egg length ( $\mu\text{m}$ ), for all combinations of four levels of selection and two levels of rearing  
521 density, averaged across all blocks. The error bars show 95% confidence intervals, calculated from post-hoc  
522 Tukey's HSD, and allow for visual hypothesis testing – identical superscript letters denote means that did  
523 not differ significantly, whereas different letters denote means that differed significantly.

524 Figure 6: Mean egg width ( $\mu\text{m}$ ), for all combinations of four levels of selection and two levels of rearing  
525 density, averaged across all blocks. The error bars show 95% confidence intervals, calculated from post-hoc

526 Tukey's HSD, and allow for visual hypothesis testing – identical superscript letters denote means that did  
527 not differ significantly, whereas different letters denote means that differed significantly.

528 Figure 7: The relationship between mean egg length ( $\mu\text{m}$ ), mean egg width ( $\mu\text{m}$ ) and mean hatching time  
529 (hours) across the four sets of populations. Each data point represents the mean trait value for the three traits  
530 in one combination of selection  $\times$  rearing density  $\times$  block. Note the orientation of the x and y axes.

531

532

533

534

535

536

537

538

539

540

541

542

543

544

545

546

547

548

549

550

551

552

553Figure 1

554

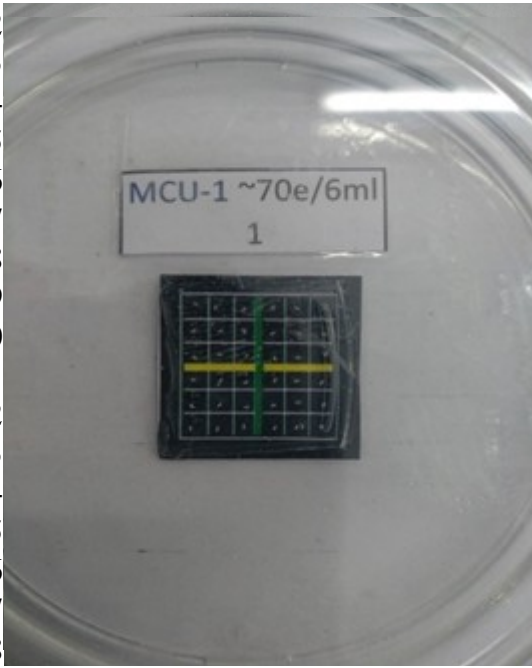



555  
556  
557  
558

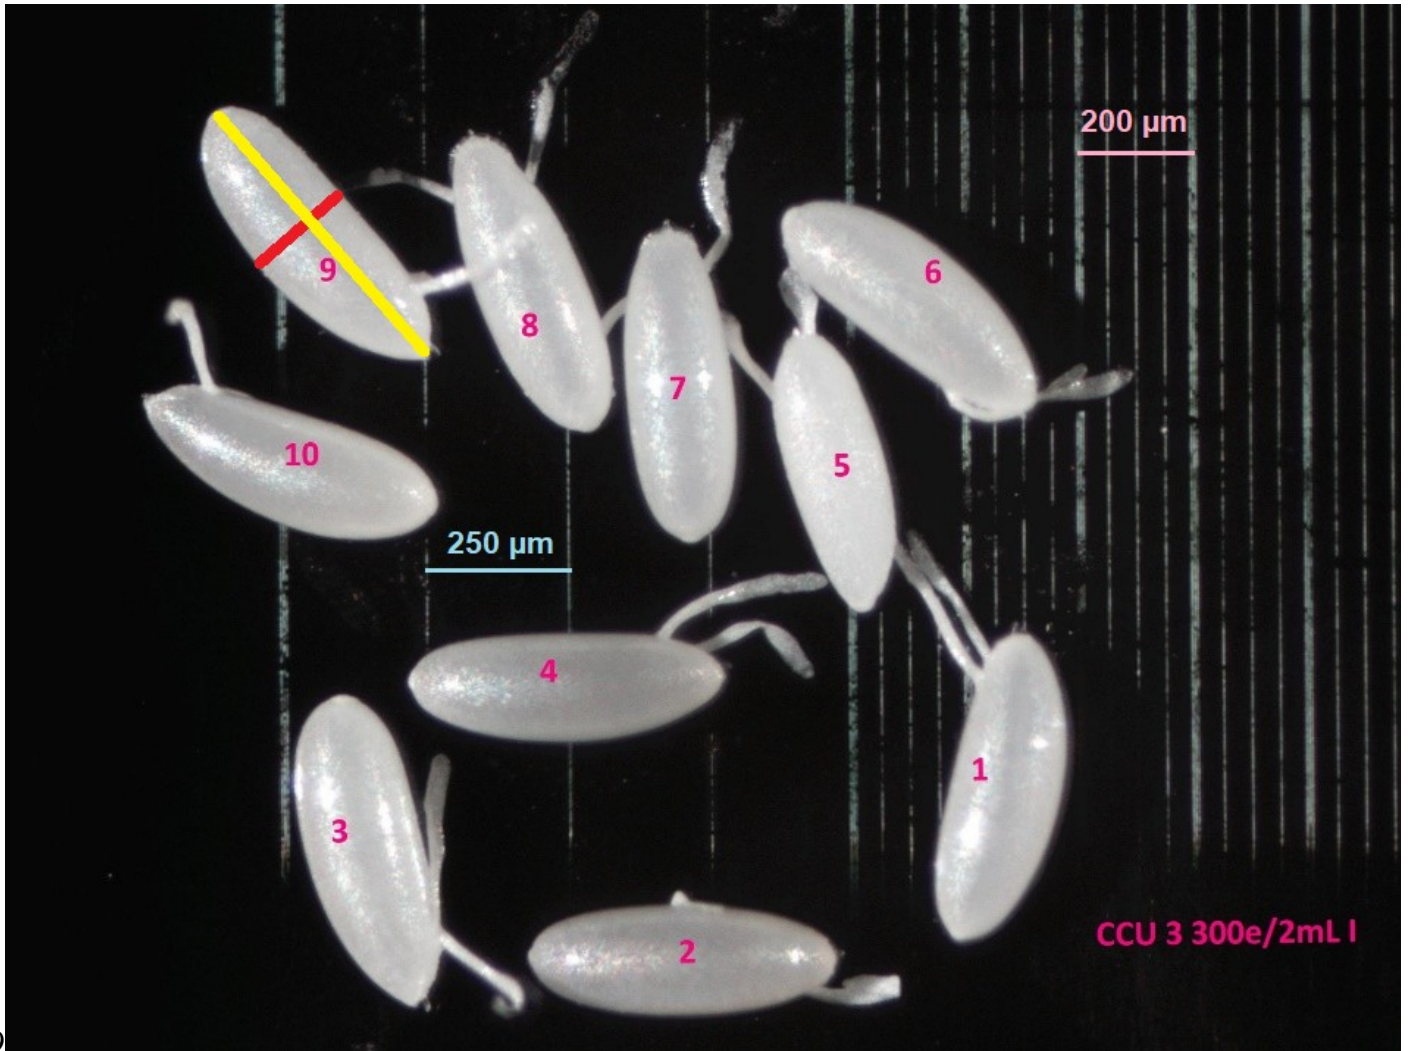

559

560 Figure 2

561

562  
563  
564  
565  
566  
567  
568  
569  
570  
571  
572  
573  
574  
575  
576  
577  
578  
579  
580  
581  
582

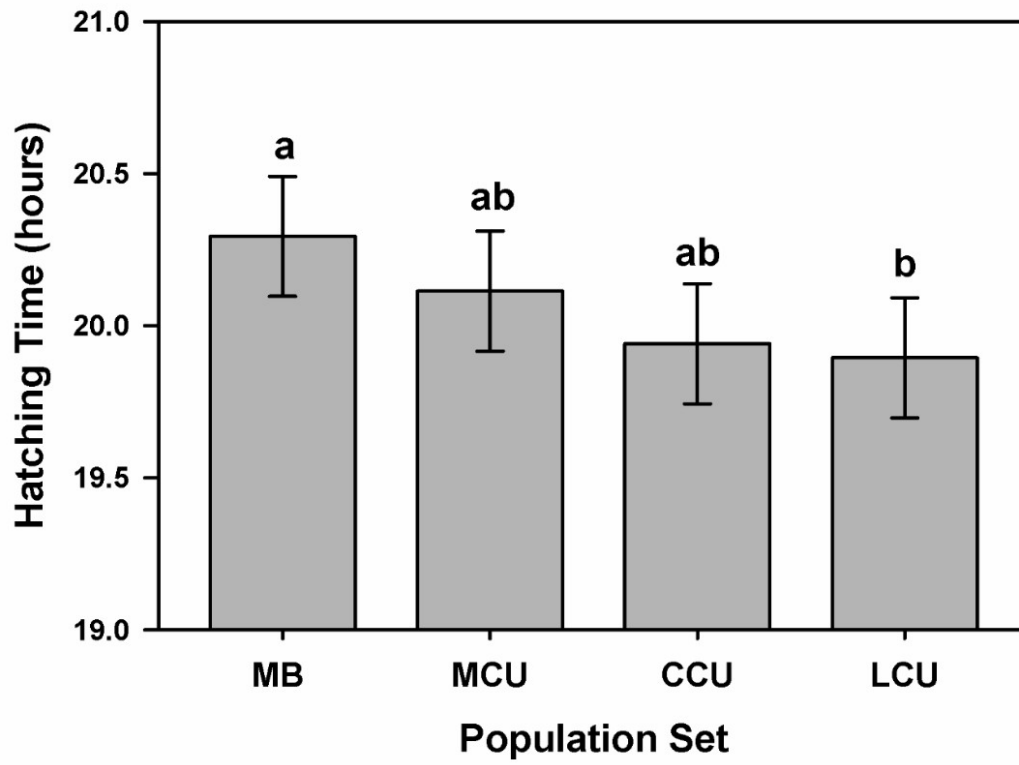

583 Figure 3

584

585

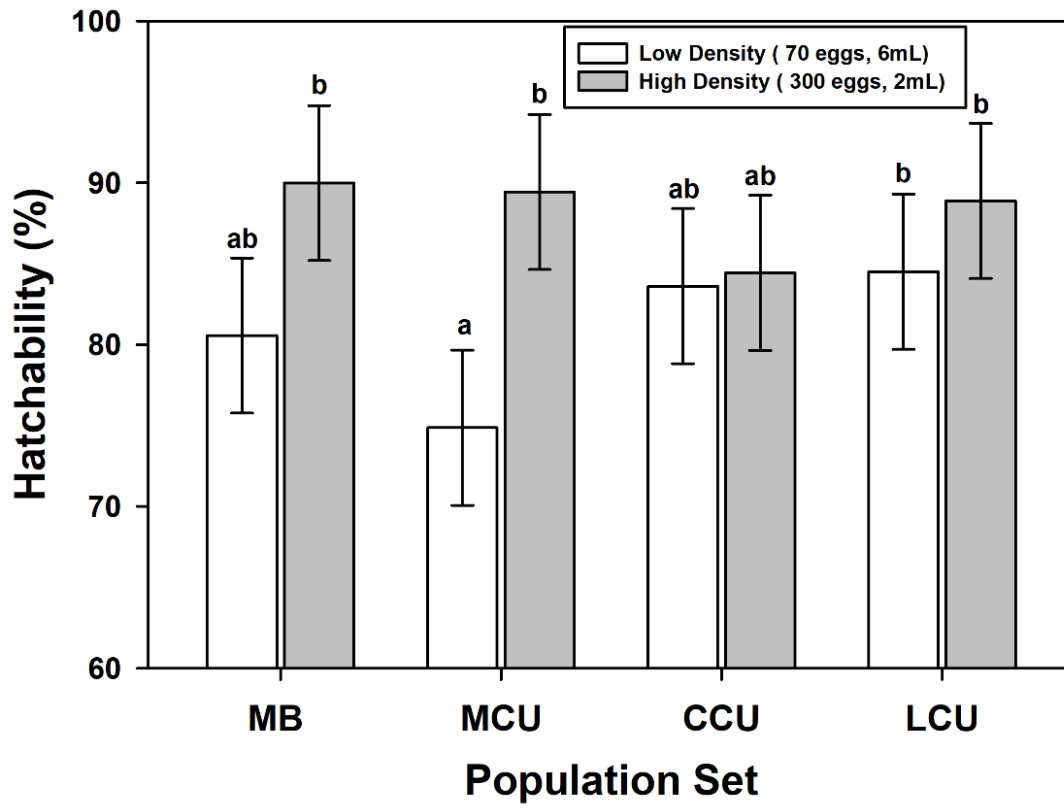

586

587

588Figure 4

589

590

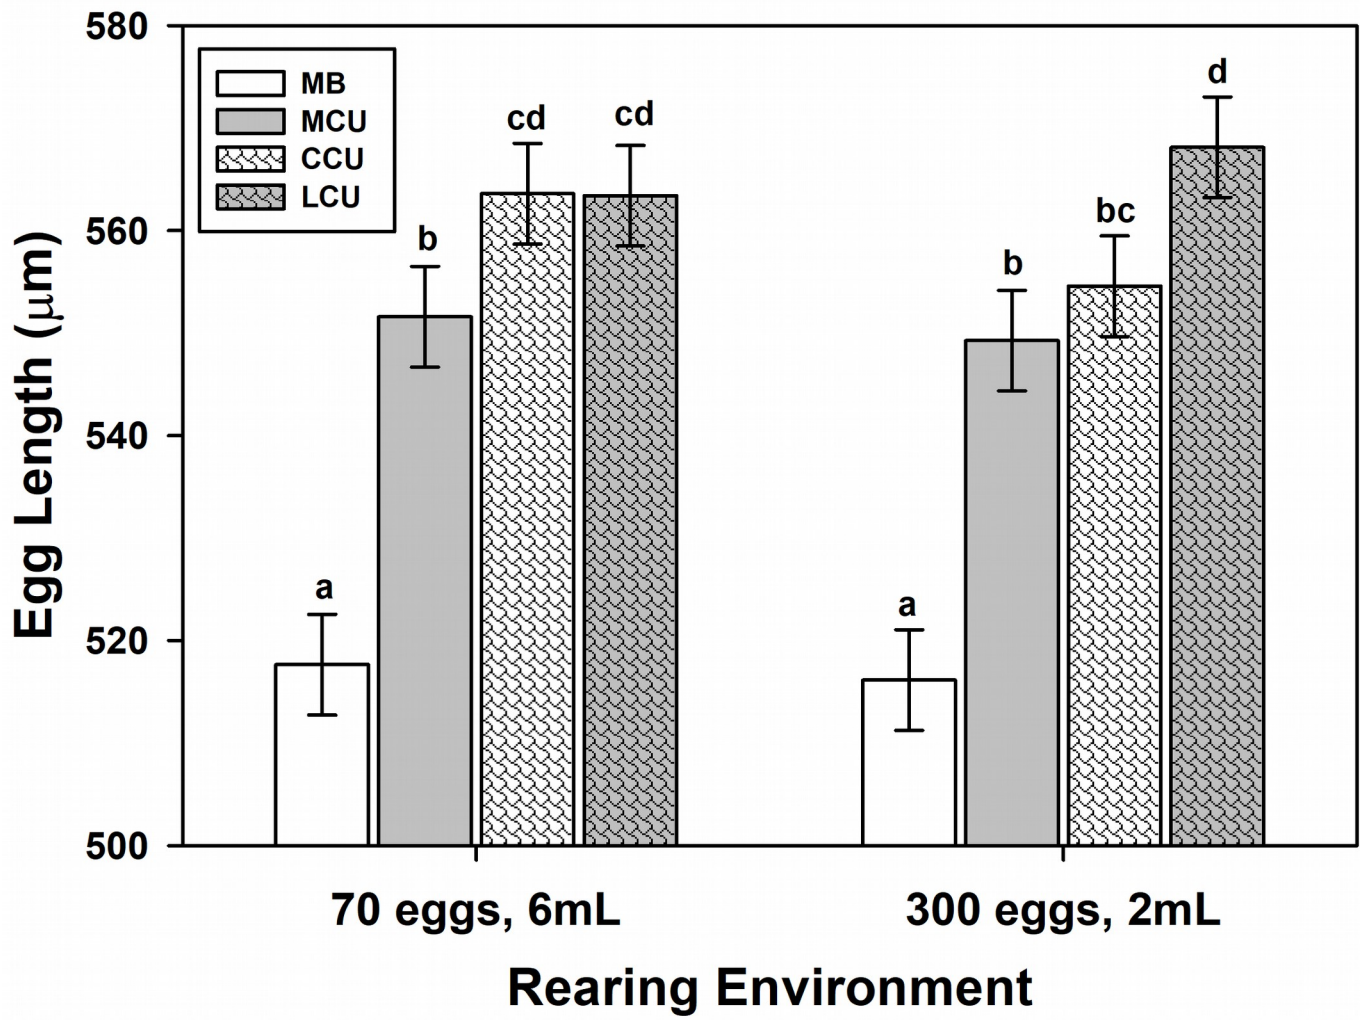

591

592

593 Figure 5

594

595

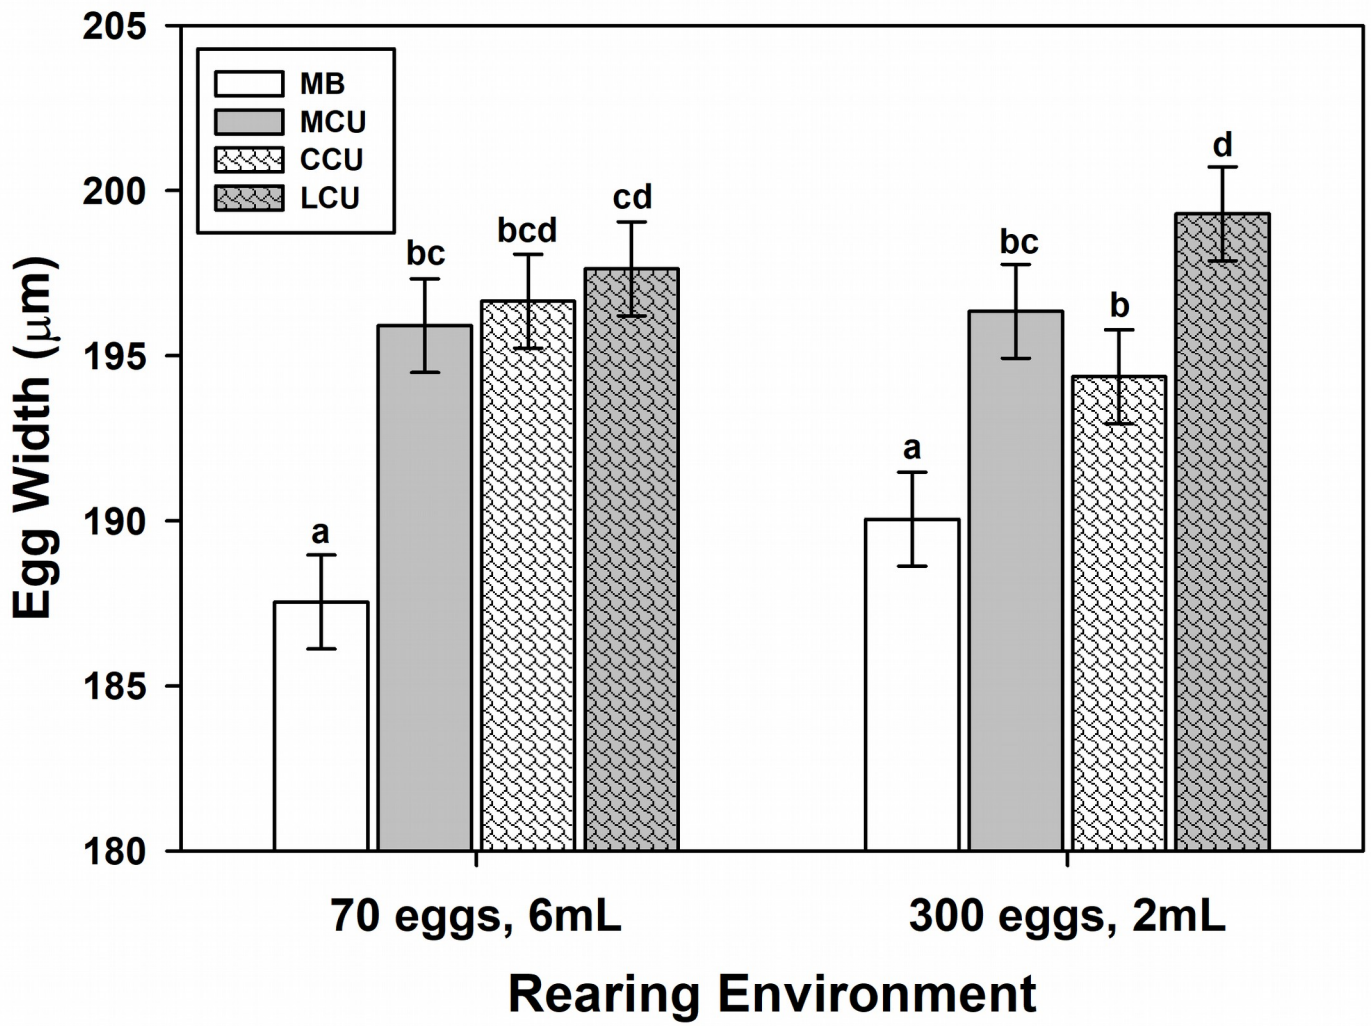

596

597

598 Figure 6

599

600

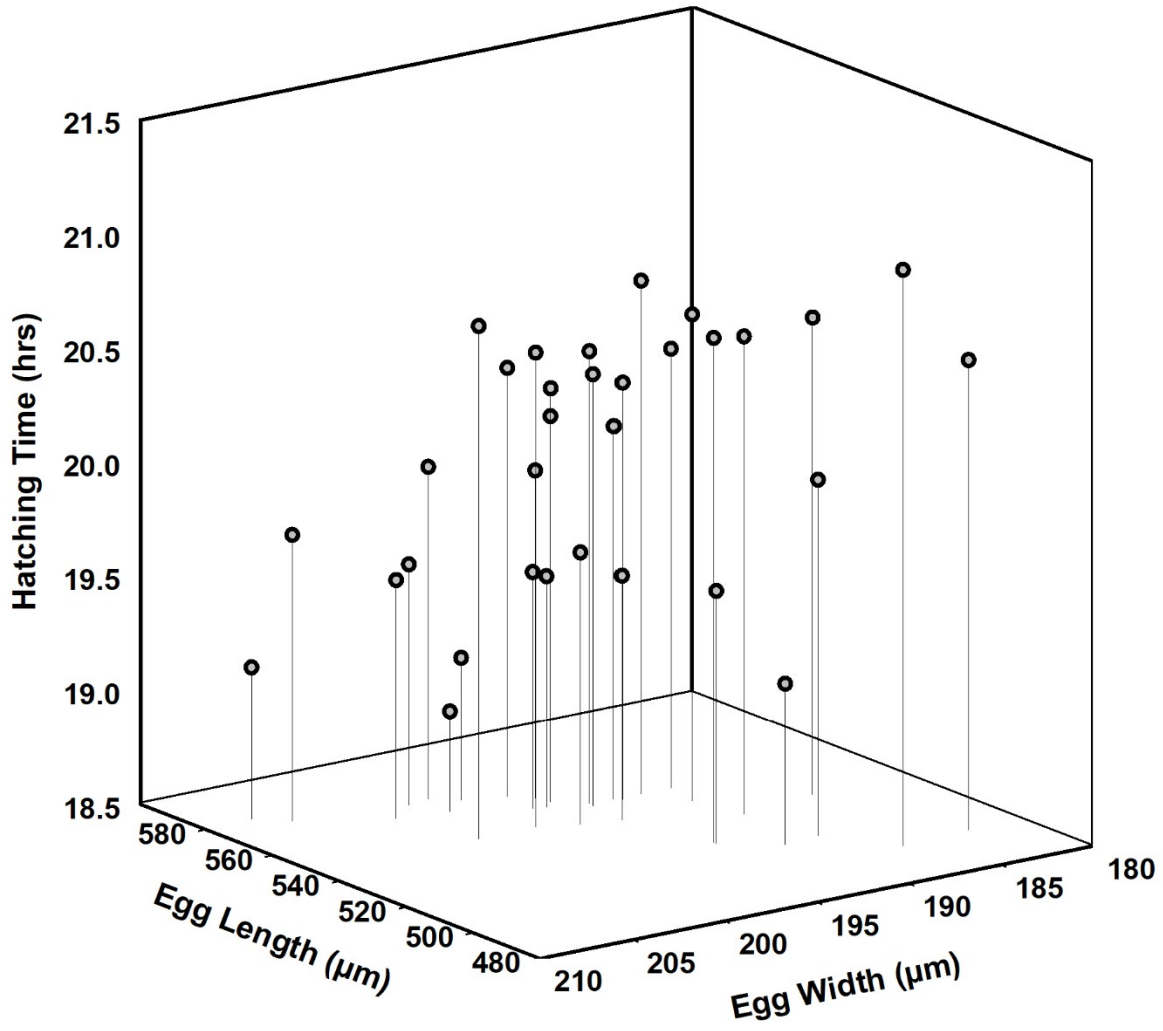

601

602 Figure 7

603

604

605
